# Supplementary material for: Enhanced visible-light photocatalytic hydrogen production activity of three-dimensional mesoporous p-CuS/n-CdS nanocrystal assemblies
Source: Royal Society of Chemistry journal article supplement (doi:10.1039/c6qi00515b), 2016-12-26
Supplement: c6qi00515b1.pdf [file c6qi00515b1.pdf]

## Electronic Supplementary Information

### **Enhanced visible-light photocatalytic hydrogen production activity of three-dimensional mesoporous p-CuS/n-CdS nanocrystal assemblies**

*Ioannis Vamvasakis,<sup>a</sup> Adelaida Trapali,<sup>a</sup> Jianwei Miao,<sup>b</sup> Bin Liu<sup>b</sup> and Gerasimos S. Armatas<sup>\*a</sup>*

<sup>a</sup>University of Crete, Department of Materials Science and Technology, Vassilika Vouton, Heraklion 71003, Greece.

<sup>b</sup>Nanyang Technological University, School of Chemical and Biomedical Engineering, 62 Nanyang Drive, Singapore 637459, Singapore.

\*E-mail: [garmatas@materials.uoc.gr](mailto:garmatas@materials.uoc.gr)

**Table S1.** Comparison of H<sub>2</sub>-production activity of different metal sulfide photocatalysts studied under similar experimental conditions.

| Photocatalyst                                                                     | Reaction conditions                                                                        | Light source                      | H <sub>2</sub> -production activity (QE at $\lambda=420$ nm) | Ref.  |
|-----------------------------------------------------------------------------------|--------------------------------------------------------------------------------------------|-----------------------------------|--------------------------------------------------------------|-------|
| MoS <sub>2</sub> /CdS composites                                                  | 0.1 g catalyst, 10 vol% lactic acid solution                                               | 300-W Xe lamp ( $\lambda>420$ nm) | ~0.53 mmol h <sup>-1</sup>                                   | [5]   |
| WS <sub>2</sub> /CdS particles                                                    | 0.1 g catalyst, 10 vol% lactic acid solution                                               | 300-W Xe lamp ( $\lambda>420$ nm) | ~0.42 mmol h <sup>-1</sup> (QE~5%)                           | [6]   |
| NiS/CdS composites                                                                | 0.3 g catalyst, 30 vol% lactic acid solution                                               | 300-W Xe lamp ( $\lambda>420$ nm) | ~2.18 mmol h <sup>-1</sup> (QE~51.3%)                        | [7]   |
| Pt/CdS nanostructures                                                             | 0.15 g catalyst, 0.25 M Na <sub>2</sub> SO <sub>3</sub> /0.35 M Na <sub>2</sub> S solution | 300-W Xe lamp ( $\lambda>420$ nm) | ~4.1 mmol h <sup>-1</sup> (QE~60.3%)                         | [8a]  |
| Pt/CdS NCAs                                                                       | 20 mg catalyst, 10 vol% ethanolic alkaline (5M NaOH) solution                              | 300-W Xe lamp ( $\lambda>420$ nm) | ~1.2 mmol h <sup>-1</sup> (QE~70%)                           | [8b]  |
| CuS/ZnS nanosheets                                                                | 0.2 g catalyst, 0.25 M Na <sub>2</sub> SO <sub>3</sub> /0.35 M Na <sub>2</sub> S solution  | 350-W Xe lamp ( $\lambda>420$ nm) | ~0.21 mmol h <sup>-1</sup> (QE~20%)                          | [14]  |
| Co <sub>3</sub> O <sub>4</sub> /CdS nanocomposites                                | 50 mg catalyst, 10 vol% lactic acid solution                                               | 350-W Xe lamp ( $\lambda>420$ nm) | ~0.15 mmol h <sup>-1</sup> (QE~9.7%)                         | [25a] |
| Cu <sub>2</sub> S/CdS nanoparticles                                               | 0.2 g catalyst, 0.25 M Na <sub>2</sub> SO <sub>3</sub> /0.35 M Na <sub>2</sub> S solution  | 300-W Xe lamp ( $\lambda>420$ nm) | ~0.4 mmol h <sup>-1</sup> (QE~9.5%)                          | [25b] |
| Cd <sub>0.8</sub> Zn <sub>0.2</sub> S particles                                   | 0.2 g catalyst, 0.25 M Na <sub>2</sub> SO <sub>3</sub> /0.35 M Na <sub>2</sub> S solution  | 350-W Xe lamp ( $\lambda>430$ nm) | ~0.18 mmol h <sup>-1</sup> (QE~10.2%)                        | [25c] |
| CdS/Zn <sub>0.2</sub> Cd <sub>0.8</sub> S composites                              | 0.2 g catalyst, 0.04 M Na <sub>2</sub> SO <sub>3</sub> /0.1 M Na <sub>2</sub> S solution   | 350-W Xe lamp ( $\lambda>400$ nm) | ~0.11 mmol h <sup>-1</sup> (QE~6.3%)                         | [25d] |
| Cd <sub>0.1</sub> Cu <sub>0.01</sub> Zn <sub>0.89</sub> S particles               | 0.3 g catalyst, 0.3 M Na <sub>2</sub> SO <sub>3</sub> /0.2 M Na <sub>2</sub> S solution    | 350-W Xe lamp ( $\lambda>430$ nm) | ~0.35 mmol h <sup>-1</sup> (QE~9.6%)                         | [25e] |
| (Zn <sub>0.95</sub> Cu <sub>0.05</sub> ) <sub>0.67</sub> Cd <sub>0.33</sub> S NCs | 0.3 g catalyst, 0.35 M Na <sub>2</sub> SO <sub>3</sub> /0.25 M Na <sub>2</sub> S solution  | 300-W Xe lamp ( $\lambda>420$ nm) | ~0.51 mmol h <sup>-1</sup> (QE~15.7%)                        | [25f] |
| CdS/CNTs nanocomposites                                                           | 35 mg catalyst, 0.25 M Na <sub>2</sub> SO <sub>3</sub> /0.35 M Na <sub>2</sub> S solution  | 300-W Xe lamp ( $\lambda>420$ nm) | ~0.17 mmol h <sup>-1</sup> (QE~2.1%)                         | [25g] |
| ZnS-In <sub>2</sub> S <sub>3</sub> -CuS nanospheres                               | 0.3 g catalyst, 1.2 M Na <sub>2</sub> SO <sub>3</sub> /0.1 M Na <sub>2</sub> S solution    | 300-W Xe lamp ( $\lambda>400$ nm) | ~3.6 mmol h <sup>-1</sup> (QE~22.6%)                         | [25h] |
| CdS-ZnS-In <sub>2</sub> S <sub>3</sub> microspheres                               | 15 mg catalyst, 1.4 M Na <sub>2</sub> SO <sub>3</sub> /0.1 M Na <sub>2</sub> S solution    | 300-W Xe lamp ( $\lambda>400$ nm) | ~0.12 mmol h <sup>-1</sup> (QE~40.9%)                        | [25i] |
| ZnS-In <sub>2</sub> S <sub>3</sub> -Ag <sub>2</sub> S nanostructures              | 15 mg catalyst, 0.35 M Na <sub>2</sub> SO <sub>3</sub> /0.25 M Na <sub>2</sub> S solution  | 300-W Xe lamp ( $\lambda>400$ nm) | ~3.3 mmol h <sup>-1</sup> (QE~19.8%)                         | [25j] |

|                                                                |                                                                                            |                                                         |                                             |                     |
|----------------------------------------------------------------|--------------------------------------------------------------------------------------------|---------------------------------------------------------|---------------------------------------------|---------------------|
| Pt/Ag <sub>2</sub> S/CdS composites                            | 0.1 g catalyst, 0.25 M Na <sub>2</sub> SO <sub>3</sub> /0.35 M Na <sub>2</sub> S solution  | 150-W solar simulator (AM1.5)                           | ~0.09 mmol h <sup>-1</sup>                  | [25k]               |
| MoS <sub>2</sub> /mpg-C <sub>3</sub> N <sub>4</sub> composites | 20 mg catalyst, 10 vol% lactic acid solution                                               | 300-W Xe lamp ( $\lambda > 420$ nm)                     | ~0.02 mmol h <sup>-1</sup> (QE~2.1%)        | [25l]               |
| <b>CuS/CdS NCAs</b>                                            | <b>20 mg catalyst, 0.25 M Na<sub>2</sub>SO<sub>3</sub>/0.35 M Na<sub>2</sub>S solution</b> | <b>300-W Xe lamp (<math>\lambda &gt; 420</math> nm)</b> | <b>~0.28 mmol h<sup>-1</sup> (QE~12.6%)</b> | <b>In this work</b> |

**Table S2.** Analytical data obtained from Mott-Schottky plots for pristine CdS and different Cu-loaded CdS NCAs.

| Sample     | $E_{\text{FB}}$<br>(V vs. NHE) | Slope <sup>a</sup><br>(F <sup>-2</sup> cm <sup>4</sup> V <sup>-1</sup> ) | Donor concentration <sup>b</sup><br>(cm <sup>-3</sup> ) |
|------------|--------------------------------|--------------------------------------------------------------------------|---------------------------------------------------------|
| CdS NCAs   | -0.41                          | $4.034 \times 10^{10}$                                                   | $3.93 \times 10^{16}$                                   |
| 3% CuS/CdS | -0.44                          | $4.825 \times 10^{10}$                                                   | $3.28 \times 10^{16}$                                   |
| 5% CuS/CdS | -0.43                          | $4.267 \times 10^{10}$                                                   | $3.71 \times 10^{16}$                                   |
| 8% CuS/CdS | -0.51                          | $3.466 \times 10^{10}$                                                   | $4.55 \times 10^{16}$                                   |

<sup>a</sup>Slope (k) =  $1/(E-E_{\text{FB}})C^2$ , where C is the space charge capacitance, E is the applied potential and  $E_{\text{FB}}$  is the flat-band potential. <sup>b</sup>Donor concentration ( $N_{\text{D}}$ ) given by  $N_{\text{D}} = 2(E-E_{\text{FB}}) \cdot C^2 / \epsilon \epsilon_0 e$ , where  $\epsilon$  is the relative dielectric constant of CdS (8.9),  $\epsilon_0$  is the dielectric permittivity ( $8.8542 \times 10^{-10}$  F cm<sup>-1</sup>) and e is the elementary charge ( $1.602 \times 10^{-19}$  C).

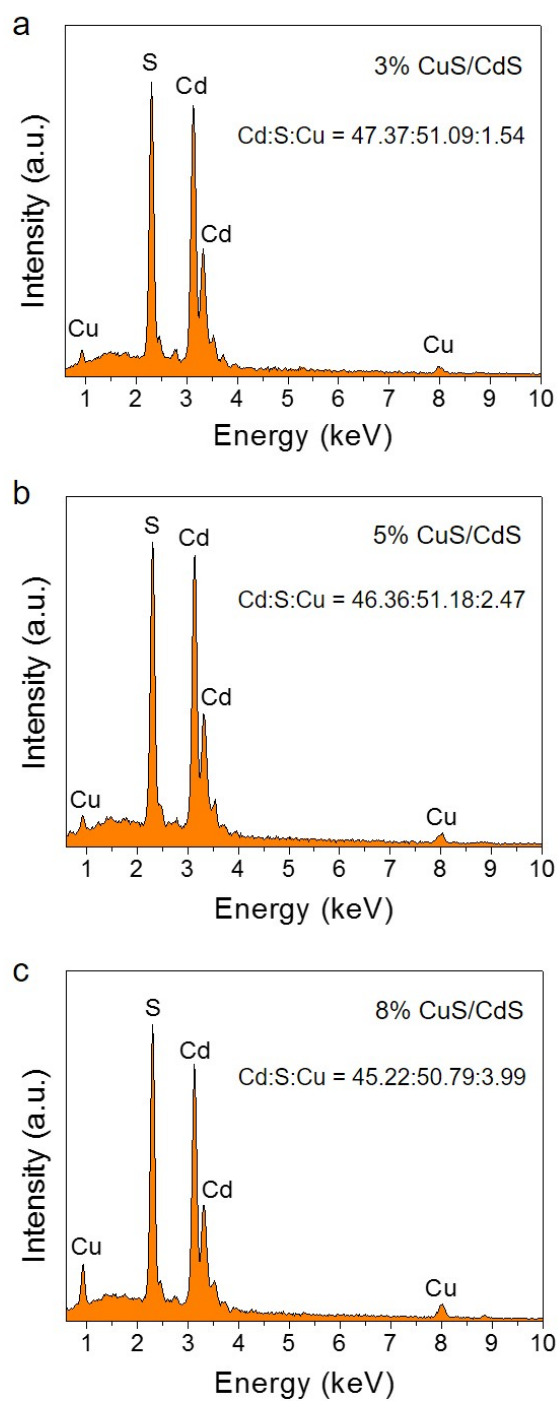

**Fig. S1** Typical EDS spectra of the mesoporous Cu-loaded CdS NCAs.

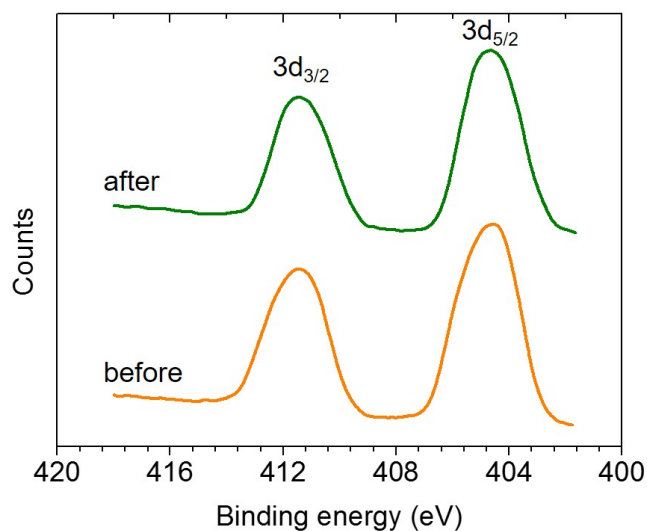

**Fig. S2** High-resolution Cd  $3d_{5/2}$  and  $3d_{3/2}$  core-level photoelectron spectra of the mesoporous 5% CuS/CdS NCAs before and after photocatalytic reaction.

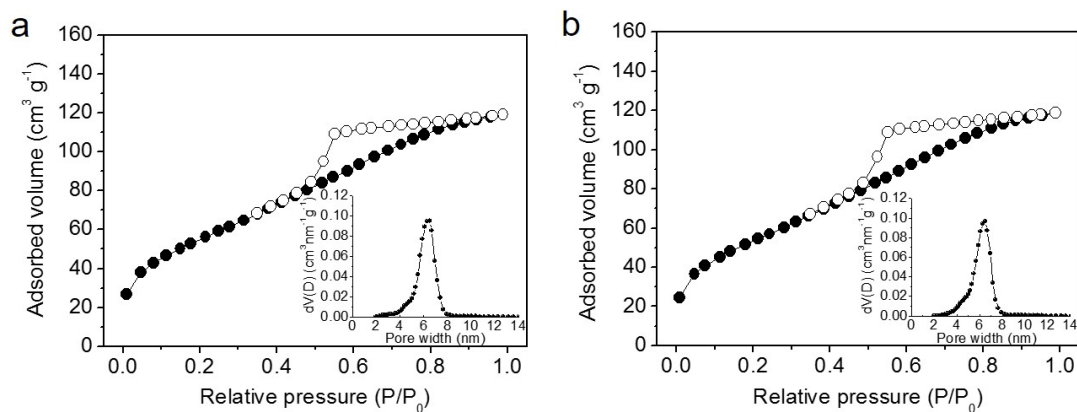

**Fig. S3** Nitrogen adsorption-desorption isotherms at  $-196\text{ }^{\circ}\text{C}$  for the mesoporous (a) 3% CuS/CdS and (b) 8% CuS/CdS NCAs catalysts. Insets: The corresponding NLDFT pore size distributions calculated from the adsorption branch of isotherms.

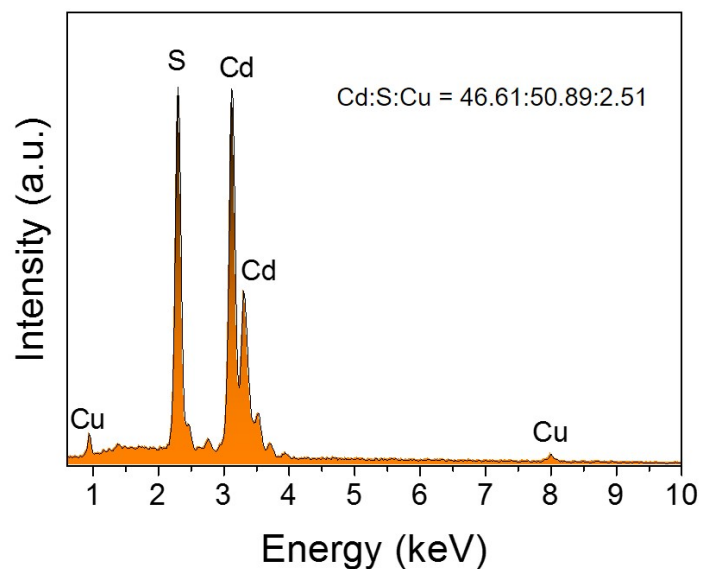

**Fig. S4** Typical EDS spectrum of the bulk Cu-loaded CdS solid.

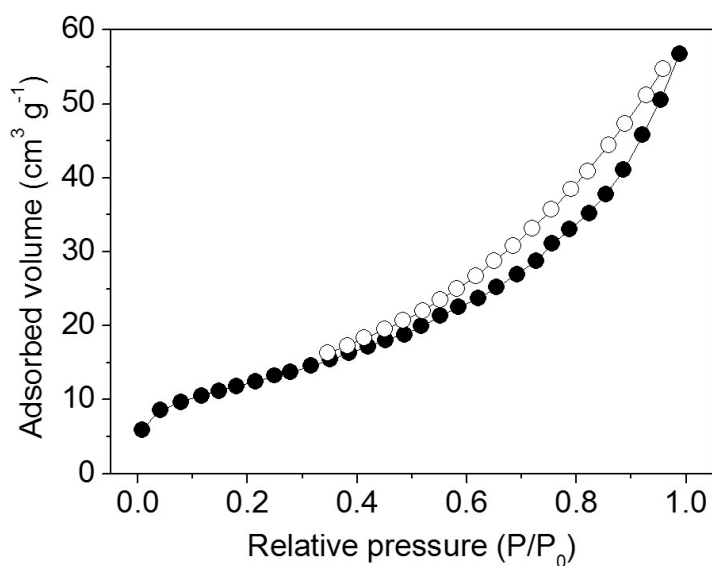

**Fig. S5** Nitrogen adsorption-desorption isotherms at -196 °C for the bulk Cu-loaded CdS solid (5% CuS/CdS bulk). Analysis of the adsorption data indicates a BET surface area of 45 m<sup>2</sup> g<sup>-1</sup> and a total pore volume of 0.08 cm<sup>3</sup> g<sup>-1</sup>.

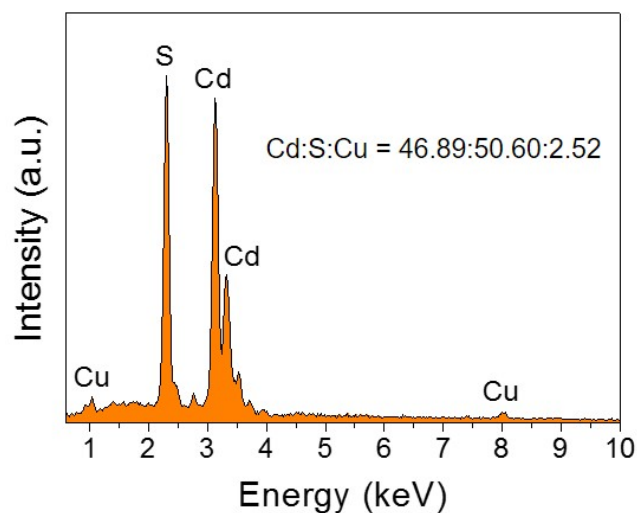

**Fig. S6** Typical EDS spectrum of the regenerated mesoporous 5% CuS/CdS NCAs catalyst, showing a Cu content of ~5.09 mol%.

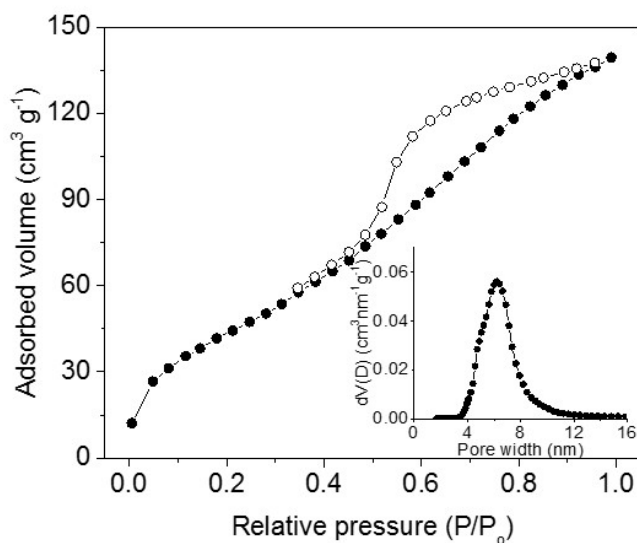

**Fig. S7** Nitrogen adsorption-desorption isotherms at -196 °C and the corresponding NLDFT pore size distribution (inset) for the 5% CuS/CdS NCAs catalyst retrieved after 20 hours of photocatalytic reaction.
